# Supplementary material for: Ancient origin and maternal inheritance of blue cuckoo eggs
Source: Springer Nature journal article supplement (doi:10.1038/ncomms10272), 2016-01-12
Supplement: 41467_2016_BFncomms10272_MOESM331_ESM.pdf [file 41467_2016_BFncomms10272_MOESM331_ESM.pdf]

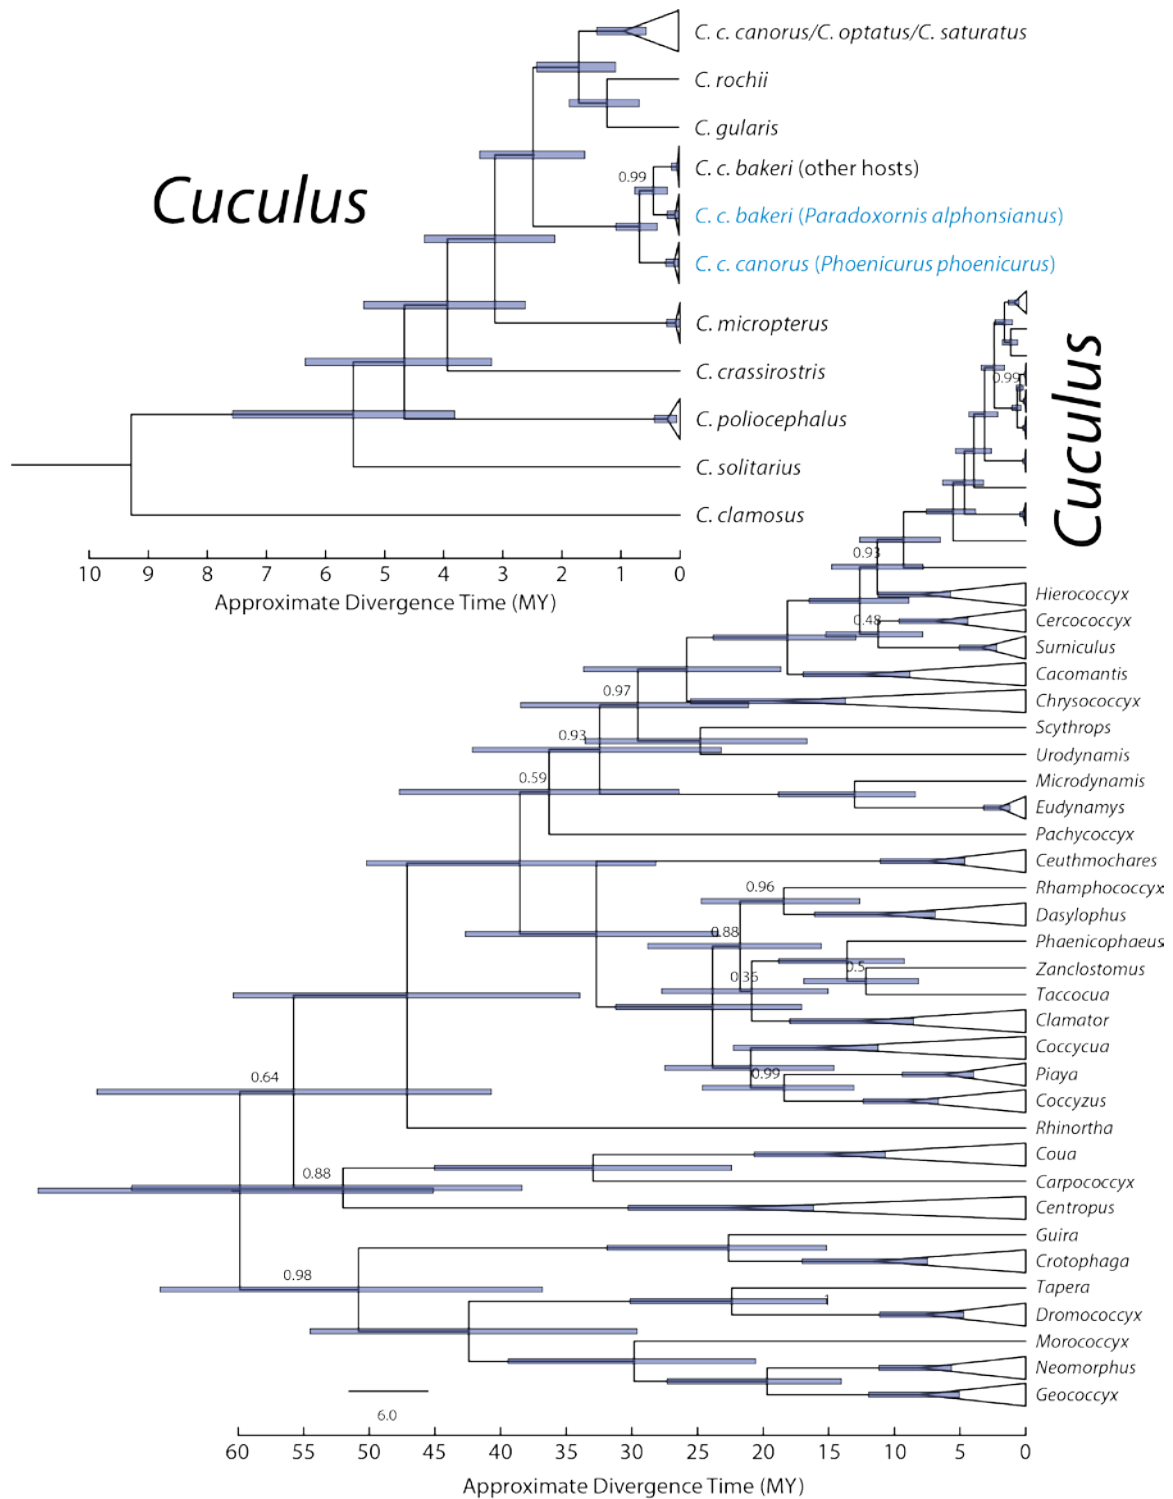

**Supplementary Figure 2 | BEAST<sup>1</sup> analysis showing the phylogenetic relationship with approximate divergence time of Cuculiformes.** Based on mitochondrial 12S and ND2 sequences representing 119 of 141 recognized cuckoo species from Sorenson and Payne (2005)<sup>2</sup>, augmented with representative samples of additional *Cuculus* samples from the present study. Multiple samples for genera other than *Cuculus* are collapsed into a single branch. Posterior probabilities for all illustrated nodes are 1.0 unless otherwise indicated. Names of host species are listed in parentheses, and blue text denotes common cuckoos laying blue eggs (top figure). See Methods for details on the analysis.

**Supplementary Table 1 | Genetic samples of European cuckoos.** Samples of common cuckoo (*Cuculus canorus*) nestlings from Europe included in the population genetic analyses after assigning sibship and maternity using COLONY<sup>3</sup>. Among 205 genotyped cuckoo nestlings, 197 could successfully be assigned to 104 inferred mothers. \*Three additional samples were added after the population genetic analyses to investigate the geographic distribution of the two divergent mitochondrial lineages (see Fig. 1).

| Country        | Locality     | Host species       |                                  | No offspring | No females | Latitude | Longitude |
|----------------|--------------|--------------------|----------------------------------|--------------|------------|----------|-----------|
| Bulgaria       | Zlatia       | Great reed warbler | <i>Acrocephalus arundinaceus</i> | 33           | 18         | 43.77    | 23.50     |
| Hungary        | Apaj         | Great reed warbler | <i>Acrocephalus arundinaceus</i> | 23           | 13         | 47.12    | 19.10     |
| Bulgaria       | Zlatia       | Marsh warbler      | <i>Acrocephalus palustris</i>    | 23           | 11         | 43.77    | 23.50     |
| Germany        | Diergarten   | Reed warbler       | <i>Acrocephalus scirpaceus</i>   | 5            | 1          | 51.23    | 6.10      |
| Germany        | Mohrhof      | Reed warbler       | <i>Acrocephalus scirpaceus</i>   | 6            | 3          | 49.67    | 10.85     |
| Czech Republic | Luzice       | Reed warbler       | <i>Acrocephalus scirpaceus</i>   | 15           | 6          | 48.83    | 17.07     |
| Poland         | Milicz       | Reed warbler       | <i>Acrocephalus scirpaceus</i>   | 19           | 13         | 51.53    | 17.37     |
| Norway         | Øvre Heimdal | Meadow pipit       | <i>Anthus pratensis</i>          | 2            | 2          | 61.42    | 8.87      |
| Norway         | Hafjell      | Meadow pipit       | <i>Anthus pratensis</i>          | 1            | 1          | 61.23    | 10.71     |
| Sweden         | Ammarnäs     | Meadow pipit       | <i>Anthus pratensis</i>          | 1            | 1          | 65.97    | 16.21     |
| Finland        | Kittilä      | Brambling          | <i>Fringilla montifringilla</i>  | 4            | 3          | 67.65    | 24.90     |
| Bulgaria       | Zlatia       | Corn bunting       | <i>Miliaria calandra</i>         | 33           | 15         | 43.77    | 23.50     |
| Finland        | Ruokolahti   | Common redstart    | <i>Phoenicurus phoenicurus</i>   | 32           | 17         | 61.42    | 28.53     |
| TOTAL:         |              |                    |                                  | 197          | 104        |          |           |
| *Romania       | Lake Sic     | Great reed warbler | <i>Acrocephalus arundinaceus</i> | 1            |            | 46.93    | 23.9      |
| *Denmark       | Arresø       | Reed warbler       | <i>Acrocephalus scirpaceus</i>   | 1            |            | 55.90    | 12.06     |
| *Spain         | Ebro delta   | Reed warbler       | <i>Acrocephalus scirpaceus</i>   | 1            |            | 40.73    | 0.78      |

**Supplementary Table 2 | Pairwise genetic divergence (above diagonal) between European common cuckoo *Cuculus canorus* host races. (a) COI – mitochondrial DNA, (b) MYO – nuclear autosomal DNA (2N), (c) SPIN – nuclear Z chromosome DNA and (d) microsatellites – nuclear autosomal DNA. Genetic divergence was quantified as  $\Phi_{ST}^{11}$ , a sequence-based homologue of  $F_{ST}$ , for the three sequenced loci. For the microsatellite loci, genetic divergence was analysed using hierarchical  $F_{ST}^{12}$  and sample sizes (N) below denotes number of inferred females with number of cuckoo nestlings in parentheses. *P*-values are shown below diagonal.**

**a**

| COI                     | N  | <i>P.phoenicurus</i> | <i>A.arundinaceus</i> | <i>A.scirpaceus</i> | <i>A.palustris</i> | <i>M.calandra</i> | <i>An.pratensis</i> | <i>F.montifringilla</i> |
|-------------------------|----|----------------------|-----------------------|---------------------|--------------------|-------------------|---------------------|-------------------------|
| <i>P.phoenicurus</i>    | 17 | —                    | 0.898                 | 0.911               | 0.968              | 0.912             | 0.995               | 0.994                   |
| <i>A.arundinaceus</i>   | 30 | <0.001               | —                     | ~0                  | 0.443              | 0.019             | 0.099               | 0.554                   |
| <i>A.scirpaceus</i>     | 20 | <0.001               | <i>n.s.</i>           | —                   | 0.501              | 0.051             | 0.008               | 0.574                   |
| <i>A.palustris</i>      | 11 | <0.001               | <0.001                | <0.001              | —                  | 0.240             | 0.815               | 0.817                   |
| <i>M.calandra</i>       | 13 | <0.001               | <i>n.s.</i>           | <i>n.s.</i>         | 0.037              | —                 | 0.261               | 0.502                   |
| <i>An.pratensis</i>     | 4  | 0.001                | <i>n.s.</i>           | <i>n.s.</i>         | 0.002              | 0.099             | —                   | 1.00                    |
| <i>F.montifringilla</i> | 3  | 0.001                | 0.001                 | 0.003               | 0.005              | 0.004             | 0.030               | —                       |

**b**

| MYO                     | N  | <i>P.phoenicurus</i> | <i>A.arundinaceus</i> | <i>A.scirpaceus</i> | <i>A.palustris</i> | <i>M.calandra</i> | <i>An.pratensis</i> | <i>F.montifringilla</i> |
|-------------------------|----|----------------------|-----------------------|---------------------|--------------------|-------------------|---------------------|-------------------------|
| <i>P.phoenicurus</i>    | 14 | —                    | 0.010                 | ~0                  | 0.030              | 0.046             | 0.047               | 0.127                   |
| <i>A.arundinaceus</i>   | 26 | <i>n.s.</i>          | —                     | ~0                  | 0.025              | ~0                | ~0                  | 0.040                   |
| <i>A.scirpaceus</i>     | 9  | <i>n.s.</i>          | <i>n.s.</i>           | —                   | 0.052              | 0.029             | 0.039               | 0.154                   |
| <i>A.palustris</i>      | 10 | <i>n.s.</i>          | <i>n.s.</i>           | <i>n.s.</i>         | —                  | 0.042             | ~0                  | 0.008                   |
| <i>M.calandra</i>       | 9  | 0.081                | <i>n.s.</i>           | <i>n.s.</i>         | <i>n.s.</i>        | —                 | ~0                  | ~0                      |
| <i>An.pratensis</i>     | 2  | <i>n.s.</i>          | <i>n.s.</i>           | <i>n.s.</i>         | <i>n.s.</i>        | <i>n.s.</i>       | —                   | ~0                      |
| <i>F.montifringilla</i> | 1  | 0.076                | <i>n.s.</i>           | 0.086               | <i>n.s.</i>        | <i>n.s.</i>       | <i>n.s.</i>         | —                       |

**c**

| SPIN                    | N  | <i>P.phoenicurus</i> | <i>A.arundinaceus</i> | <i>A.scirpaceus</i> | <i>A.palustris</i> | <i>M.calandra</i> | <i>An.pratensis</i> | <i>F.montifringilla</i> |
|-------------------------|----|----------------------|-----------------------|---------------------|--------------------|-------------------|---------------------|-------------------------|
| <i>P.phoenicurus</i>    | 11 | —                    | 0.027                 | ~0                  | ~0                 | 0.216             | 0.013               | 0.082                   |
| <i>A.arundinaceus</i>   | 17 | <i>n.s.</i>          | —                     | ~0                  | ~0                 | 0.141             | ~0                  | ~0                      |
| <i>A.scirpaceus</i>     | 4  | <i>n.s.</i>          | <i>n.s.</i>           | —                   | ~0                 | 0.145             | ~0                  | ~0                      |
| <i>A.palustris</i>      | 4  | <i>n.s.</i>          | <i>n.s.</i>           | <i>n.s.</i>         | —                  | 0.148             | ~0                  | ~0                      |
| <i>M.calandra</i>       | 5  | 0.071                | 0.090                 | <i>n.s.</i>         | <i>n.s.</i>        | —                 | ~0                  | 0.065                   |
| <i>An.pratensis</i>     | 2  | <i>n.s.</i>          | <i>n.s.</i>           | <i>n.s.</i>         | <i>n.s.</i>        | <i>n.s.</i>       | —                   | ~0                      |
| <i>F.montifringilla</i> | 2  | <i>n.s.</i>          | <i>n.s.</i>           | <i>n.s.</i>         | <i>n.s.</i>        | <i>n.s.</i>       | <i>n.s.</i>         | —                       |

**d**

| Microsatellites         | N       | <i>P.phoenicurus</i> | <i>A.arundinaceus</i> | <i>A.scirpaceus</i> | <i>A.palustris</i> | <i>M.calandra</i> | <i>An.pratensis</i> | <i>F.montifringilla</i> |
|-------------------------|---------|----------------------|-----------------------|---------------------|--------------------|-------------------|---------------------|-------------------------|
| <i>P.phoenicurus</i>    | 17 (32) | —                    | 0.013                 | 0.007               | 0.032              | 0.011             | 0.024               | 0.012                   |
| <i>A.arundinaceus</i>   | 31 (56) | <0.001               | —                     | 0.021               | 0.021              | 0.012             | 0.036               | 0.007                   |
| <i>A.scirpaceus</i>     | 23 (45) | 0.057                | <0.001                | —                   | 0.025              | 0.008             | 0.020               | 0.008                   |
| <i>A.palustris</i>      | 11 (23) | <0.001               | 0.002                 | <0.001              | —                  | 0.010             | 0.054               | 0.025                   |
| <i>M.calandra</i>       | 15 (33) | 0.018                | <0.001                | 0.002               | 0.019              | —                 | 0.022               | ~0                      |
| <i>An.pratensis</i>     | 4 (4)   | <i>n.s.</i>          | 0.090                 | <i>n.s.</i>         | <i>n.s.</i>        | <i>n.s.</i>       | —                   | 0.036                   |
| <i>F.montifringilla</i> | 3 (4)   | <i>n.s.</i>          | <i>n.s.</i>           | <i>n.s.</i>         | <i>n.s.</i>        | <i>n.s.</i>       | <i>n.s.</i>         | —                       |

**Supplementary Table 3 | Genetic samples of Asian and African cuckoos.** Samples of cuckoo species from Asia and Africa included in the phylogenetic analyses.

| Country    | Locality     | Cuckoo species      | Host species                     | N                              | Latitude                         | Longitude |       |       |
|------------|--------------|---------------------|----------------------------------|--------------------------------|----------------------------------|-----------|-------|-------|
| China      | Guizhou      | Common cuckoo       | <i>Cuculus c. bakeri</i>         | Ashy-throated parrotbill       | <i>Paradoxornis alphonsianus</i> | 5         | 28.2  | 107.2 |
| China      | Guizhou      | Common cuckoo       | <i>Cuculus c. bakeri</i>         | White wagtail                  | <i>Motacilla alba</i>            | 1         | 28.2  | 107.2 |
| China      | Shandong     | Common cuckoo       | <i>Cuculus c. bakeri</i>         | Oriental reed warbler          | <i>Acrocephalus orientalis</i>   | 3         | 37.7  | 118.9 |
| China      | Shanghai     | Common cuckoo       | <i>Cuculus c. bakeri</i>         | Oriental reed warbler          | <i>Acrocephalus orientalis</i>   | 3         | 31.4  | 121.8 |
| China      | Heilongjiang | Common cuckoo       | <i>Cuculus c. bakeri</i>         | Oriental reed warbler          | <i>Acrocephalus orientalis</i>   | 2         | 46.8  | 123.9 |
| China      | Gansu        | Common cuckoo       | <i>Cuculus c. canorus</i>        | Rufous-tailed shrike           | <i>Lanius isabellinus</i>        | 2         | 40.3  | 96.1  |
| Zambia     | Choma        | African cuckoo      | <i>Cuculus gularis</i>           |                                |                                  | 4         | -16.8 | 26.9  |
| Bangladesh | Dhaka        | Indian cuckoo       | <i>Cuculus micropterus</i>       | Black drongo                   | <i>Dicrurus macrocercus</i>      | 2         | 23.9  | 90.3  |
| China      | Henan        | Indian cuckoo       | <i>Cuculus micropterus</i>       | Black drongo                   | <i>Dicrurus macrocercus</i>      | 4         | 31.7  | 114.3 |
| Singapore  |              | Indian cuckoo       | <i>Cuculus micropterus</i>       |                                |                                  | 1         | 1.32  | 103.8 |
| China      | Guizhou      | Lesser cuckoo       | <i>Cuculus poliocephalus</i>     | Brownish-flanked bush-warbler  | <i>Cettia fortipes</i>           | 1         | 28.2  | 107.2 |
| Madagascar | Sakaraha     | Madagascar cuckoo   | <i>Cuculus rochii</i>            |                                |                                  | 1         | -22.7 | 44.8  |
| China      | Guizhou      | Himalayan cuckoo    | <i>Cuculus saturatus</i>         | Yellow-throated bunting        | <i>Emberiza elegans</i>          | 1         | 28.2  | 107.2 |
| China      | Guizhou      | Himalayan cuckoo    | <i>Cuculus saturatus</i>         | Yellowish-bellied bush-warbler | <i>Cettia acanthizoides</i>      | 1         | 28.2  | 107.2 |
| China      | Guizhou      | Large hawk- cuckoo  | <i>Hierococcyx sparverioides</i> | Chinese babax                  | <i>Babax lanceolatus</i>         | 1         | 28.2  | 107.2 |
| China      | Guizhou      | Large hawk- cuckoo  | <i>Hierococcyx sparverioides</i> | White-browed laughingthrush    | <i>Garrulax sannio</i>           | 1         | 28.2  | 107.2 |
| Bangladesh | Dhaka        | Common hawk- cuckoo | <i>Hierococcyx varius</i>        | Jungle babbler                 | <i>Turdoides striatus</i>        | 2         | 23.9  | 90.3  |

**Supplementary Table 4 | Genbank accession numbers.** Additional COI sequences downloaded from Genbank.

| Genbank  | Voucher      | Cuckoo species     |                                | Country     | Locality         |
|----------|--------------|--------------------|--------------------------------|-------------|------------------|
| AB842683 | BJNSM381-10  | Common cuckoo      | <i>Cuculus canorus</i>         | Japan       | Nagano           |
| AB842684 | BJNSM378-10  | Common cuckoo      | <i>Cuculus canorus</i>         | Japan       | Nagano           |
| AB842685 | BJNSM379-10  | Common cuckoo      | <i>Cuculus canorus</i>         | Japan       | Nagano           |
| EF515762 | KRIBB2279    | Common cuckoo      | <i>Cuculus canorus</i>         | South Korea | South Cholla     |
| GQ481655 | UWBM 56594   | Common cuckoo      | <i>Cuculus canorus</i>         | Russia      | Astrakhan'       |
| GQ481656 | UWBM 47024   | Common cuckoo      | <i>Cuculus canorus</i>         | Russia      | Stekol'nyy       |
| GQ481657 | UWBM 66441   | Common cuckoo      | <i>Cuculus canorus</i>         | Russia      | Kyzyl            |
| GQ481658 | UWBM 58010   | Common cuckoo      | <i>Cuculus canorus</i>         | Mongolia    | Hangayn Nuruu    |
| GQ481659 | UWBM 46365   | Common cuckoo      | <i>Cuculus canorus</i>         | Kazakhstan  | Akkol'           |
| GU571356 | NHMO-BC47    | Common cuckoo      | <i>Cuculus canorus</i>         | Norway      | Utsira           |
| GU571357 | NHMO-BC304   | Common cuckoo      | <i>Cuculus canorus</i>         | Norway      | Jomfruland       |
| GU571847 | BISE-Aves292 | Common cuckoo      | <i>Cuculus canorus</i>         | Sweden      | Södertälje       |
| GU571848 | BISE-Aves143 | Common cuckoo      | <i>Cuculus canorus</i>         | Sweden      | Åkersberga       |
| JN801307 | USNM 621533  | Common cuckoo      | <i>Cuculus canorus</i>         | Mongolia    | Hangayn Nuruu    |
| AB842691 | BJNSM231-10  | Lesser cuckoo      | <i>Cuculus poliocephalus</i>   | Japan       | Nagano           |
| AB842692 | BJNSM614-10  | Lesser cuckoo      | <i>Cuculus poliocephalus</i>   | Japan       | Sakishima Isls.  |
| AB842693 | BJNSM604-10  | Lesser cuckoo      | <i>Cuculus poliocephalus</i>   | Japan       | Amami Isls.      |
| AB842688 | BJNSM135-10  | Oriental cuckoo    | <i>Cuculus optatus</i>         | Japan       | Hyogo            |
| AB842689 | BJNSM218-10  | Oriental cuckoo    | <i>Cuculus optatus</i>         | Japan       | Obihiro-shi      |
| AB842690 | BJNSM683-10  | Oriental cuckoo    | <i>Cuculus optatus</i>         | Japan       | Sakishima Isls.  |
| GQ481660 | UWBM 44563   | Oriental cuckoo    | <i>Cuculus optatus</i>         | Russia      | Koryaki          |
| GQ481661 | UWBM 44401   | Oriental cuckoo    | <i>Cuculus optatus</i>         | Russia      | Magadan          |
| GQ481662 | UWBM 56743   | Oriental cuckoo    | <i>Cuculus optatus</i>         | Russia      | Noyabr'sk        |
| GQ481663 | UWBM 71703   | Oriental cuckoo    | <i>Cuculus optatus</i>         | Russia      | Rudnaya Pristan' |
| GQ481664 | UWBM 49457   | Oriental cuckoo    | <i>Cuculus optatus</i>         | Russia      | Nizhniye Sergi   |
| AB842686 | BJNSM436-10  | Rufous hawk-cuckoo | <i>Hierococcyx hyperythrus</i> | Japan       | Tokachi-shicho   |
| AB842687 | BJNSM498-10  | Rufous hawk-cuckoo | <i>Hierococcyx hyperythrus</i> | Japan       | Tokachi-shicho   |

**Supplementary Table 5 | Pairwise genetic divergence (above diagonal) between selected lineages of the common cuckoo *Cuculus canorus*.** (a) COI – mitochondrial DNA, (b) MYO – nuclear autosomal DNA (2N) and (c) SPIN – nuclear Z chromosome DNA. Genetic divergence was quantified as  $\Phi_{ST}^{11}$ , a sequence-based homologue of  $F_{ST}$ .  $P$ -values are shown below diagonal.

**a**

| COI                                 | N  | <i>C. c. canorus</i><br>( <i>P. phoenicurus</i> ) | <i>all other</i><br><i>C. c. canorus</i> | <i>C. c. bakeri</i> |
|-------------------------------------|----|---------------------------------------------------|------------------------------------------|---------------------|
| <i>C. c. canorus/P. phoenicurus</i> | 17 | —                                                 | 0.861                                    | 0.596               |
| <i>all other C. c. canorus</i>      | 78 | <0.001                                            | —                                        | 0.740               |
| <i>C. c. bakeri</i>                 | 12 | <0.001                                            | <0.001                                   | —                   |

**b**

| MYO                                 | N        | <i>C. c. canorus</i><br>( <i>P. phoenicurus</i> ) | <i>all other</i><br><i>C. c. canorus</i> | <i>C. c. bakeri</i> |
|-------------------------------------|----------|---------------------------------------------------|------------------------------------------|---------------------|
| <i>C. c. canorus/P. phoenicurus</i> | 18 (36)  | —                                                 | 0.019                                    | ~0                  |
| <i>all other C. c. canorus</i>      | 69 (138) | <i>n.s.</i>                                       | —                                        | 0.005               |
| <i>C. c. bakeri</i>                 | 9 (18)   | <i>n.s.</i>                                       | <i>n.s.</i>                              | —                   |

**c**

| SPIN                                | N  | <i>C. c. canorus</i><br>( <i>P. phoenicurus</i> ) | <i>all other</i><br><i>C. c. canorus</i> | <i>C. c. bakeri</i> |
|-------------------------------------|----|---------------------------------------------------|------------------------------------------|---------------------|
| <i>C. c. canorus/P. phoenicurus</i> | 11 | —                                                 | 0.087                                    | 0.226               |
| <i>all other C. c. canorus</i>      | 34 | 0.092                                             | —                                        | ~0                  |
| <i>C. c. bakeri</i>                 | 6  | <i>n.s.</i>                                       | <i>n.s.</i>                              | —                   |



**Supplementary Table 6 | Genetic samples of museum eggshells.** Samples of common cuckoo *Cuculus canorus* museum eggs genotyped for the short COI sequence from V. Čapek's collection stored in the Moravian Museum, Budisov, Czech Republic. Mitochondrial lineages corresponded perfectly with egg colouration (immaculate blue versus speckled egg types), irrespective of host species. The speckled cuckoo eggs found in redstart nests and blue cuckoo eggs found in the nests of hosts with speckled eggs were therefore likely 'mis-layings' by females belonging to the other mitochondrial lineage. Some cuckoo females are known to lay their eggs in nests of more than one host species<sup>4,5</sup>

| Museum ID | Year | Locality  | Host species      |                                | Egg type  | Mitochondrial DNA lineage |
|-----------|------|-----------|-------------------|--------------------------------|-----------|---------------------------|
| MZM4888   | 1896 | NA        | Meadow pipit      | <i>Anthus trivialis</i>        | Blue      | <i>bakeri</i>             |
| MZM4429   | 1901 | Budkovice | European robin    | <i>Erithacus rubecula</i>      | Blue      | <i>bakeri</i>             |
| MZM4524   | 1907 | Chvojnice | European robin    | <i>Erithacus rubecula</i>      | Blue      | <i>bakeri</i>             |
| MZM4830   | 1904 | Zbejsov   | European robin    | <i>Erithacus rubecula</i>      | Blue      | <i>bakeri</i>             |
| MZM4862   | 1897 | Neslovice | Red-backed shrike | <i>Lanius collurio</i>         | Blue      | <i>bakeri</i>             |
| MZM4899   | 1909 | Padochov  | White wagtail     | <i>Motacilla alba</i>          | Pale blue | <i>bakeri</i>             |
| MZM4900   | 1898 | Nova Ves  | White wagtail     | <i>Motacilla alba</i>          | Blue      | <i>bakeri</i>             |
| MZM4739   | 1894 | Padochov  | Common redstart   | <i>Phoenicurus phoenicurus</i> | Pale blue | <i>bakeri</i>             |
| MZM4746   | 1902 | Nova Ves  | Common redstart   | <i>Phoenicurus phoenicurus</i> | Blue      | <i>bakeri</i>             |
| MZM4748   | 1907 | Nova Ves  | Common redstart   | <i>Phoenicurus phoenicurus</i> | Blue      | <i>bakeri</i>             |
| MZM4753   | 1906 | Padochov  | Common redstart   | <i>Phoenicurus phoenicurus</i> | Blue      | <i>bakeri</i>             |
| MZM4753   | 1906 | Padochov  | Common redstart   | <i>Phoenicurus phoenicurus</i> | Speckled  | <i>canorus</i>            |
| MZM4755   | 1910 | Ivancice  | Common redstart   | <i>Phoenicurus phoenicurus</i> | Blue      | <i>bakeri</i>             |
| MZM4756   | 1899 | Ivancice  | Common redstart   | <i>Phoenicurus phoenicurus</i> | Blue      | <i>bakeri</i>             |
| MZM4758   | 1912 | Ivancice  | Common redstart   | <i>Phoenicurus phoenicurus</i> | Blue      | <i>bakeri</i>             |
| MZM4759   | 1901 | Rena      | Common redstart   | <i>Phoenicurus phoenicurus</i> | Blue      | <i>bakeri</i>             |
| MZM4762   | 1902 | Budkovice | Common redstart   | <i>Phoenicurus phoenicurus</i> | Blue      | <i>bakeri</i>             |
| MZM4763   | 1908 | Budkovice | Common redstart   | <i>Phoenicurus phoenicurus</i> | Blue      | <i>bakeri</i>             |
| MZM4764   | 1909 | Budkovice | Common redstart   | <i>Phoenicurus phoenicurus</i> | Blue      | <i>bakeri</i>             |
| MZM4765   | 1907 | Budkovice | Common redstart   | <i>Phoenicurus phoenicurus</i> | Pale blue | <i>bakeri</i>             |
| MZM4766   | 1908 | Budkovice | Common redstart   | <i>Phoenicurus phoenicurus</i> | Pale blue | <i>bakeri</i>             |
| MZM4769   | 1911 | Budkovice | Common redstart   | <i>Phoenicurus phoenicurus</i> | Pale blue | <i>bakeri</i>             |
| MZM4769   | 1911 | Budkovice | Common redstart   | <i>Phoenicurus phoenicurus</i> | Blue      | <i>bakeri</i>             |
| MZM4775   | 1906 | Oslavany  | Common redstart   | <i>Phoenicurus phoenicurus</i> | Speckled  | <i>canorus</i>            |
| MZM4777   | 1892 | Oslavany  | Common redstart   | <i>Phoenicurus phoenicurus</i> | Speckled  | <i>canorus</i>            |
| MZM4782   | 1909 | Oslavany  | Common redstart   | <i>Phoenicurus phoenicurus</i> | Speckled  | <i>canorus</i>            |
| MZM4783   | 1905 | Oslavany  | Common redstart   | <i>Phoenicurus phoenicurus</i> | Speckled  | <i>canorus</i>            |
| MZM4785   | 1908 | Zbejsov   | Common redstart   | <i>Phoenicurus phoenicurus</i> | Speckled  | <i>canorus</i>            |
| MZM4788   | 1900 | Ivancice  | Common redstart   | <i>Phoenicurus phoenicurus</i> | Speckled  | <i>canorus</i>            |
| MZM4789   | 1907 | Hliny     | Common redstart   | <i>Phoenicurus phoenicurus</i> | Speckled  | <i>canorus</i>            |
| MZM4791   | 1897 | Rena      | Common redstart   | <i>Phoenicurus phoenicurus</i> | Speckled  | <i>canorus</i>            |
| MZM4334   | 1891 | Oslavany  | Wood warbler      | <i>Phylloscopus sibilatrix</i> | Blue      | <i>bakeri</i>             |
| MZM4359   | 1909 | Budkovice | Garden warbler    | <i>Sylvia borin</i>            | Blue      | <i>bakeri</i>             |

**Supplementary Table 7 | Genetic samples of blue museum eggshells.** Blue common cuckoo *Cuculus canorus* eggs from museums genotyped for the short COI sequence from the Natural History Museum, University of Oslo, Norway (NHMO) and Natural History Museum, Tring, UK (NHMUK). All eggs belonged to the *bakeri* mitochondrial lineage.

| Museum ID             | Year | Country     | Locality      | Host species                                 |                                |
|-----------------------|------|-------------|---------------|----------------------------------------------|--------------------------------|
| NHMO-LE3198           | 1892 | Norway      | Hvalstad      | Winchat                                      | <i>Saxicola rubetra</i>        |
| NHMUK-1873            | 1873 | Greece      | Parnassus     | Blackeared wheatear                          | <i>Oenanthe hispanica</i>      |
| NHMUK-85G1            | 1880 | Netherlands | Valkenwaard   | Common redstart                              | <i>Phoenicurus phoenicurus</i> |
| NHMUK-1919.21.5289    | 1899 | Hungary     | Csepel Island | Common redstart                              | <i>Phoenicurus phoenicurus</i> |
| NHMUK-Baker Box48/D2  | 1907 | Pakistan    | Thandiani     | <i>(oviduct fragment, unknown host race)</i> |                                |
| NHMUK-1925.12.15.5852 | 1914 | Pakistan    | Murree        | Rufous-bellied niltava                       | <i>Niltava sundara</i>         |
| NHMUK-1996.1.126      | 1923 | Burma       | NA            | Pied bushchat                                | <i>Saxicola caprata</i>        |

**Supplementary Table 8 | Genetic markers.** PCR primers and characteristics of loci used for DNA sequencing. The three new primer pairs designed in this study were used to sequence the African cuckoo *Cuculus gularis* and Madagacar cuckoo *C. rochii* (Spindlin), the common cuckoo *C. canorus* (CHDW) and the museum eggshell samples (COI).

| Locus                          | Primer   | Target        | Size (bp) | Primer sequence (5' - 3')  |
|--------------------------------|----------|---------------|-----------|----------------------------|
| Spindlin <sup>6</sup>          | Spin319F | ChrZ, Intron2 | 951       | TATGGACTAGAACTGCACAAAG     |
|                                | Spin472R |               |           | AGACCATCCCCCTCCATTCATC     |
| Spindlin <sup>This study</sup> | SpinCuF  | ChrZ, Intron2 | 856       | CAGCACTTGAAGTTCTTCCAGAC    |
|                                | SpinCuR  |               |           | GCTTTACCAATCATTGTGTCTGCC   |
| Myoglobin <sup>6</sup>         | MYO2     | Chr1, Intron2 | 721       | GCCACCAAGCACAAGATCCC       |
|                                | MYO3F    |               |           | TTCAGCAAGGACCTTGATAATGACTT |
| COI <sup>7</sup>               | Bird F1  | mtDNA         | 695       | TTCTCCAACCACAAAGACATTGGCAC |
|                                | Bird R1  |               |           | ACGTGGGAGATAATTCCAAATCCTG  |
| COI <sup>This study</sup>      | COI-CuF  | mtDNA         | 159       | CATCACAACAGCCATCAACA       |
|                                | COI-CuR  |               |           | TAATACGGGGTCACCTCCTC       |
| ND2 <sup>2</sup>               | L5216    | mtDNA         | 1087      | GGCCCATACCCCGRAAATG        |
|                                | H5766    |               |           | RGAKGAGAARGCYAGGATYTTKCG   |
|                                | L5758    |               |           | GGNGGNTGAATRGGNYTNAAYCARAC |
|                                | H6313    |               |           | ACTCTTRTTTAAGGCTTTGAAGGC   |
| 12S <sup>2</sup>               | L1263    | mtDNA         | 1027      | YAAAGCATGRCACCTGAA         |
|                                | H1859    |               |           | TCGDTRYAGRACAGGCTCCTCTA    |
|                                | L1754    |               |           | TGGGATTAGATACCCCACTATG     |
|                                | H2294    |               |           | TYTCAGGYGTARGCTGARTGCTT    |
| CHDW <sup>This study</sup>     | CHDwF    | ChrW          | 443       | CATTGAGATCACCGTTTCACTTC    |
|                                | CHDwR    |               |           | GTAACATTTTCCATTTCTGGAGG    |

**Supplementary Table 9 | Microsatellite markers.** Summary statistics for microsatellite loci genotyped in European common cuckoos *Cuculus canorus*. Observed ( $H_O$ ) and expected ( $H_E$ ) heterozygosity is shown with  $P$ -values for tests of deviations from Hardy-Weinberg equilibrium for each marker.

| Locus               | N   | No alleles | Allele size range | $H_O$ | $H_E$ | $P$   |
|---------------------|-----|------------|-------------------|-------|-------|-------|
| Ccy1 <sup>8</sup>   | 104 | 4          | 6                 | 0.25  | 0.26  | 0.36  |
| Ccy9 <sup>8</sup>   | 104 | 4          | 4                 | 0.54  | 0.51  | 0.63  |
| Ccy13 <sup>8</sup>  | 104 | 8          | 18                | 0.77  | 0.74  | 0.52  |
| Ccy60 <sup>9</sup>  | 104 | 26         | 51                | 0.92  | 0.90  | 0.36  |
| Ccy88 <sup>9</sup>  | 104 | 11         | 20                | 0.78  | 0.79  | 0.27  |
| Ccy100 <sup>9</sup> | 101 | 6          | 12                | 0.65  | 0.72  | 0.33  |
| Ccy108 <sup>9</sup> | 104 | 9          | 22                | 0.63  | 0.61  | 0.40  |
| Ccy119 <sup>9</sup> | 104 | 32         | 48                | 0.88  | 0.94  | 0.018 |
| Ccy137 <sup>9</sup> | 104 | 23         | 48                | 0.77  | 0.91  | 0.001 |
| Cba8 <sup>10</sup>  | 104 | 31         | 47                | 0.90  | 0.94  | 0.008 |
| Clu2 <sup>10</sup>  | 99  | 8          | 30                | 0.64  | 0.67  | 0.26  |
| Clu3 <sup>10</sup>  | 104 | 5          | 4                 | 0.38  | 0.42  | 0.59  |
| Clu5 <sup>10</sup>  | 103 | 16         | 24                | 0.90  | 0.88  | 0.17  |

**Supplementary Table 10 | Estimates of divergence time** for the basal split between the New World cuckoos, comprising Crotophaginae and Neomorphinae, and the predominantly Old World clade comprising all other cuckoos.

| Age            | Reference                              |
|----------------|----------------------------------------|
| 69.0 MY        | Sibley & Ahlquist 1990 <sup>13</sup>   |
| 52.0 MY        | van Tuinen & Hedges 2001 <sup>14</sup> |
| ~47-52 MY      | Ericson et al. 2006 <sup>15</sup>      |
| ~54.4 MY       | Brown et al. 2007 <sup>16</sup>        |
| 52.5-79.5 MY   | Brown et al. 2008 <sup>17</sup>        |
| 59.76-63.38 MY | Pacheco et al. 2011 <sup>18</sup>      |

## Supplementary References

1. Drummond, A. J. *et al.* Bayesian phylogenetics with BEAUti and the BEAST 1.7. *Mol. Biol. Evol.* **29**, 1969-1973 (2012).
2. Sorenson, M. D. & Payne, R. B. in *The cuckoos* (eds R. B. Payne, M. D. Sorenson, K. Klitz, & J. Megahan) 68-94 (Oxford University Press, 2005).
3. Jones, O. R. & Wang, J. COLONY: A program for parentage and sibship inference from multilocus genotype data. *Mol. Ecol. Resour.* **10**, 551-555 (2010).
4. Fossøy, F. *et al.* Genetic differentiation among sympatric cuckoo host races: males matter. *Proc. R. Soc. B* **278**, 1639-1645 (2011).
5. Marchetti, K., Nakamura, H. & Gibbs, H. L. Host-race formation in the common cuckoo. *Science* **282**, 471-472 (1998).
6. Kimball, R. T. *et al.* A well-tested set of primers to amplify regions spread across the avian genome. *Mol. Phylogenet. Evol.* **50**, 654-660 (2009).
7. Hebert, P. D. N. *et al.* Identification of birds through DNA barcodes. *PLoS Biol.* **2**, 1657-1663 (2004).
8. Gibbs, H. L., Brooke, M. D. & Davies, N. B. Analysis of genetic differentiation of host races of the common cuckoo *Cuculus canorus* using mitochondrial and microsatellite DNA variation. *Proc. R. Soc. B* **263**, 89-96 (1996).
9. Gibbs, H. L. *et al.* Isolation and characterization of microsatellite DNA loci for an obligate brood parasitic bird, the common cuckoo (*Cuculus canorus*). *Mol. Ecol.* **7**, 1437-1439 (1998).
10. Adcock, G. J., Langmore, N. E. & Kilner, R. M. Polymorphic microsatellite loci for studies of bronze-cuckoo species (Genus *Chalcites*: Aves). *Mol. Ecol. Notes* **7**, 678-680 (2007).
11. Excoffier, L., Smouse, P. E. & Quattro, J. M. Analysis of molecular variance inferred from metric distances among DNA haplotypes - application to human mitochondrial DNA restriction data. *Genetics* **131**, 479-491 (1992).
12. Goudet, J. Hierfstat, a package for R to compute and test hierarchical *F*-statistics. *Mol. Ecol. Notes* **5**, 184-186 (2005).
13. Sibley, C. & Ahlquist, J. *Phylogeny and classification of birds: A study in molecular evolution.* (Yale University Press, 1990).
14. van Tuinen, M. & Hedges, S. B. Calibration of avian molecular clocks. *Mol. Biol. Evol.* **18**, 206-213 (2001).
15. Ericson, P. G. P. *et al.* Diversification of Neoaves: Integration of molecular sequence data and fossils. *Biol. Letters* **2**, 543-547 (2006).
16. Brown, J. W., Payne, R. B. & Mindell, D. P. Nuclear DNA does not reconcile 'rocks' and 'clocks' in Neoaves: a comment on Ericson *et al.* *Biol. Letters* **3**, 257-260 (2007).
17. Brown, J. W. *et al.* Strong mitochondrial DNA support for a Cretaceous origin of modern avian lineages. *BMC Biology* **6**, 1-18 (2008).
18. Pacheco, M. A. *et al.* Evolution of modern birds revealed by mitogenomics: Timing the radiation and origin of major orders. *Mol. Biol. Evol.* **28**, 1927-1942 (2011).
